# Supplementary material for: Chromatin accessibility: a window into the genome
Source: PubMed Central journal article supplement (PMC4253006; doi:10.1186/1756-8935-7-33), 2014-11-20

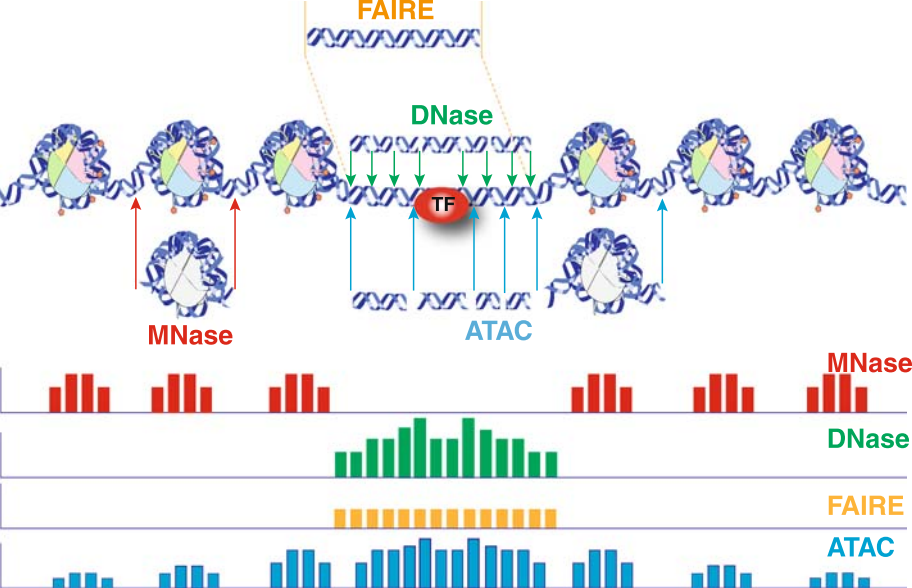

Supplement: 13072_2014_338_MOESM1_ESM.pdf [file 13072_2014_338_MOESM1_ESM.pdf]
