# Supplementary material for: Chromatin accessibility: a window into the genome
Source: PubMed Central journal article supplement (PMC4253006; doi:10.1186/1756-8935-7-33), 2014-11-20
Supplement: 13072_2014_338_MOESM2_ESM.pdf [file 13072_2014_338_MOESM2_ESM.pdf]

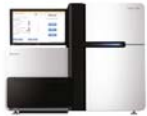

① ↓ Demultiplexing

FASTQ files

② ↓ Alignment

BAM files

③ ↓ Filtering and QC

Cleaned alignment files

**MNase-seq**

④ Assay QC  
Visualization

⑤ Nucleosome  
calling

Nucleosome  
occupancy and  
positioning

**DNase-seq**

⑥ Assay QC  
Visualization

⑦ Peak  
calling

Peak file

⑧ Footprint  
analysis

TF footprints

**FAIRE-seq**

⑨ Assay QC  
Visualization

⑩ Peak  
calling

Peak file

⑪ CORE  
analysis

CORE locations

**ATAC-seq**

⑫ Assay QC  
Visualization

⑬ Peak  
calling

Peak file

⑭ Footprint  
analysis

TF footprints

⑮ Nucleosome  
calling

⑯ Annotation to genomic features and other datasets
